# Supplementary material
Source: publisher figshare collection journal article supplement (https://sage.figshare.com/ndownloader/files/18044474)
Supplement: Supplementary file 1 [file 18044474]

**Appendix 1.** Full Results for the Association between Protein Intake per Eating Occasion and Functional Disability.

|  | **Odds Ratio** | **95% Confidence Interval** | |
| --- | --- | --- | --- |
| **1 Occasion (Reference: 0 Occasions)** | 0.60 | 0.38, | 0.95 |
| **2 Occasions (Reference: 0 Occasions)** | 0.48 | 0.30, | 0.77 |
| **3 Occasions (Reference: 0 Occasions)** | 0.47 | 0.29, | 0.77 |
| **4 Occasions (Reference: 0 Occasions)** | 0.39 | 0.20, | 0.75 |
| Female (Reference: Male) | 0.57 | 0.48, | 0.67 |
| Non-Hispanic Black (Reference: Non-Hispanic White) | 0.70 | 0.59, | 0.83 |
| Hispanic (Reference: Non-Hispanic White) | 0.85 | 0.71, | 1.02 |
| Other Ethnicity (Reference: Non-Hispanic White) | 1.26 | 0.93, | 1.70 |
| Age | 1.08 | 1.07, | 1.09 |
| Protein-Adjusted Total Calories† | 1.02 | 1.01, | 1.04 |
| Current Smoker (Reference: Previous Smoker) | 1.23 | 0.93, | 1.62 |
| Non-Smoker (Reference: Previous Smoker) | 0.72 | 0.61, | 0.85 |
| Moderate Physical Activity (Reference: No Moderate Physical Activity) | 0.68 | 0.59, | 0.80 |
| Self-Rated Health (Reference: Poor) |  |  |  |
| Excellent | 0.06 | 0.03, | 0.12 |
| Very Good | 0.13 | 0.07, | 0.24 |
| Good | 0.17 | 0.09, | 0.32 |
| Fair | 0.47 | 0.25, | 0.88 |
| Body Mass Index | 1.08 | 1.06, | 1.09 |
| Diabetes (Reference: No Diabetes) | 1.21 | 0.99, | 1.48 |
| Married (Reference: Not Married) | 0.78 | 0.63, | 0.96 |
| Graduated High School (Reference: No High School Graduate) | 0.89 | 0.74, | 1.08 |
| Live Alone (Reference: Not Alone) | 0.87 | 0.69, | 1.08 |

†Per 100 Calories.

*Note*: Protein intake per eating occasion threshold was ≥0.25 g/kg/meal.
